# Supplementary material
Source: PubMed Central journal article supplement (PMC8536332)
Supplement: pnas.2101614118.sapp.pdf [file pnas.2101614118.sapp.pdf]

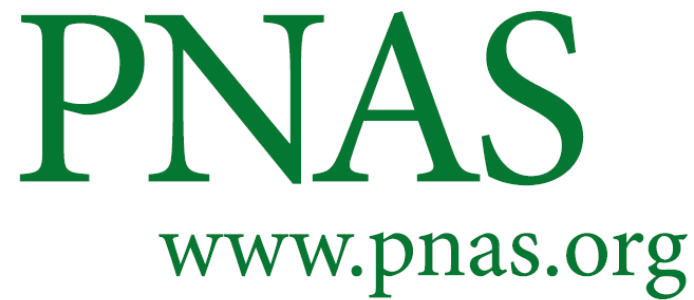

**Supplementary Information for**  
Variable strategies to solve risk-reward tradeoffs in carnivore  
communities

Joel Ruprecht, Charlotte E. Eriksson, Tavis D. Forrester, Derek B. Spitz, Darren A. Clark, Mike J. Wisdom, Marcus Bianco, Mary M. Rowland, Joshua B. Smith, Bruce K. Johnson, and Taal Levi

Joel Ruprecht  
Email: [ruprechtjoel@gmail.com](mailto:ruprechtjoel@gmail.com)

**This PDF file includes:**

Supplementary text  
Figures S1 to S2  
Tables S1 to S11  
Legends for Movies S1 to S3  
SI References

**Other supplementary materials for this manuscript include the following:**

Movies S1 to S3

1 **Supplementary Information Text**

2

3 **Text S1. Development of a dynamic state variable model investigating risk and reward of**  
4 **scavenging.** We developed a two-patch dynamic state variable model (1) to qualitatively  
5 understand the conditions under which scavenging versus hunting alternative prey could  
6 represent the optimal decision for a carnivore seeking to maximize fitness. Specifically, we  
7 investigated whether the reward accrued from scavenging (i.e., facilitation) could optimize fitness  
8 despite a heightened level of risk from intraguild predation (suppression). When carnivores are  
9 given a chance to scavenge from a dominant species or competitor, they can either disregard the  
10 opportunity and continue to hunt alternative prey (representing the choice of Patch 1) or choose  
11 to scavenge carrion from the kill, readily gaining access to food but perhaps incurring a higher  
12 mortality risk (Patch 2). Under state-dependent life history theory, the choice of patch  $i$  represents  
13 the option that maximizes fitness ( $F$ ) and depends on the animal's energetic state ( $x$ ) at a given  
14 week ( $t$ ) within a biological year, weekly energetic costs ( $c$ ), the probability of finding food in patch  
15  $i$  ( $\lambda_i$ ), the probability of dying in patch  $i$  ( $d_i$ , i.e., *risk*), and the profitability of patch  $i$  ( $p_i$ , i.e. *reward*).  
16 The fitness value for visiting patch  $i$  ( $V_i$ ) is given by:

17

$$18 \quad V_i = (1-d_i)(\lambda_i F(x-c_i+p_i, t+1) + (1-\lambda_i)F(x-c_i, t+1))$$

19

20 We assumed that fitness was a saturating function of energetic state such that:

21

$$22 \quad F_t = \frac{x_t - c}{x_t - c + b}$$

23

24 where  $b$  is the energetic state in which fitness is half its maximum and  $x_t - c$  is the energetic state  
25 at week  $t$  after energetic expenditures. We let energetic state range from 1–100 where values  $\leq$   
26 10 indicated death from starvation. We varied the probability of finding food from hunting and the  
27 risk incurred from scavenging to illustrate how different strategies could become optimal under  
28 different scenarios. We used values of  $d$  (daily probability of death) of 0.002 for Patch 1 (hunting  
29 alternative prey) and 0.002, 0.005, and 0.01 (imputing annual survival rates of 0.9, 0.75, and 0.6,  
30 respectively) for Patch 2 (scavenging). We varied the probability of finding food ( $\lambda$ ), from 0.4 to  
31 0.8 for Patch 1 and held this value constant at 0.9 for Patch 2. For both patches, we assumed  
32 that daily energetic costs ( $c$ ) were 2 units and that profitability ( $p$ ) was 4 units if food was found.

33

34 The stochastic dynamic programming equation (1) identifies the optimal choice of patch  
35 (i.e. scavenging or hunting alternative prey) at a given week  $t$  in an annual cycle and for a given  
36 energetic state  $x$ :

36

37

38 Where  $V_1$  is the value of hunting alternative prey and  $V_2$  is the value of scavenging.

39

40 **Text S2. Methods for capture and GPS collaring of carnivores.** We captured and GPS-  
41 collared each of the four carnivore species as part of concurrent research on predator-prey  
42 relationships. Coyotes were captured using padded foothold traps immobilized with tiletamine-  
43 zolazepam (Telazol®) at a concentration of 10 mg/kg. A GPS collar (Lotek MiniTrack, Lotek  
44 Wireless Inc., Newmarket, ON, Canada or Vectronic Vertex, Vectronic Aerospace GmbH, Berlin,  
45 Germany) was placed on each adult coyote and was programmed to record locations every 2 or 3  
46 hours. We captured bobcats using cage traps baited with visual and olfactory attractants and  
47 administered ketamine (10 mg/kg) and xylazine (1.5 mg/kg) for immobilization, and upon release,  
48 yohimbine (0.125 mg/kg; Yobine®) was given as an antagonist for xylazine. Each bobcat was fit  
49 with a GPS collar (Lotek MiniTrack, Lotek Wireless Inc., Newmarket, ON, Canada) scheduled to  
50 take fixes every 2 hours. Black bears were captured using culvert traps or padded foot snares  
51 and were immobilized with Telazol® at a concentration of 7 mg/kg. Bears were fit with GPS  
52 collars (Lotek GPS 7000 or LiteTrack Iridium 420, Lotek Wireless Inc., Newmarket, ON, Canada)  
53 that recorded positions every 2 hours. We captured cougars using trained pursuit hounds. We

54 searched for fresh cougar tracks in snow along roads within the study area and when located,  
55 released hounds to pursue tracks until the cougar was treed. When treed, cougars were  
56 immobilized with ketamine (10 mg/kg) and xylazine (2 mg/kg) via dart gun, and before release  
57 administered yohimbine (0.125 mg/kg; Yobine®) as an antagonist for xylazine. A GPS collar  
58 (Lotek GPS 4400S, IridiumTrack M, Lotek Wireless Inc., Newmarket, ON, Canada or Vectronic  
59 Vertex Lite, Vectronic Aerospace GmbH, Berlin, Germany) was placed on each cougar and was  
60 programmed to record locations every 3 hours. For all species, GPS data were screened and  
61 errant locations were removed using established protocol for cleaning GPS data (2).  
62 All animal handling was performed in accordance with protocols approved by the USDA Forest  
63 Service, Starkey Experimental Forest Institutional Animal Care and Use Committee (IACUC No.  
64 92-F-0004; protocol #STKY-16-01) and followed the guidelines of the American Society of  
65 Mammalogists for the use of wild mammals in research (3).  
66  
67

68 **Text S3. Study area description.** Our study was centered at Starkey Experimental Forest and  
69 Range in the Blue Mountains of northeastern Oregon (45.247, -118.563). The study area is  
70 composed of a patchwork of ponderosa pine (*Pinus ponderosa*) stands and mixed pine-fir forests  
71 (*Pinus*, *Abies* and *Pseudotsuga* spp.), punctuated with grasslands dominated by native  
72 bunchgrasses (*Poa*, *Danthonia*, and *Pseudoroegneria* spp.) and invasive annual grasses  
73 (*Bromus* and *Ventenata* spp.) (4). Elevation ranges between 1,122 and 1,500 m in the study area,  
74 where an average of 51 cm of precipitation falls annually, typically as snow in the winter months  
75 (4).  
76

77 **Text S4. Detection dog surveys for scat collection.** Scat detection dogs from the University of  
78 Washington Conservation Canine program surveyed a 224 km<sup>2</sup> study area between 6 and 26  
79 June 2017. The area surveyed was composed of 56 grid cells each with an area of 4 km<sup>2</sup>.  
80 Detection dogs surveyed 6–8 km linear distance within each cell to distribute effort across the  
81 study area. Dog handlers were not given specific survey routes but were encouraged to follow  
82 natural travel corridors such as ridgelines, saddles, drainage bottoms, game trails, and fence  
83 lines. No more than 50% of the distance traveled per gridcell was permitted to be on linear  
84 features such as trails or roads. When scats were located, the handler recorded the GPS position  
85 and placed the entire scat in triplicate paper bags. Within 72 hours of collection, scats were  
86 desiccated in a drying oven for 24 hours at 40°C (5). Detection dogs in our study were trained to  
87 locate black bear, coyote, cougar, and bobcat scats.  
88

89 **Text S5. Methods of determining species ID and DNA metabarcoding of scats for diet**  
90 **analysis.** We used DNA metabarcoding to characterize the presence of vertebrate prey items in  
91 the scats of bears, bobcats, and coyotes. We extracted DNA from the scats (15 samples per  
92 extraction batch) using the DNeasy Blood and Tissue kit (Qiagen, USA) and included 1 extraction  
93 blank per batch. The prey and defecator of each scat was identified by amplifying ~100 bp of the  
94 mitochondrial 12S gene region (primers used in (6), (7), and modified from (8)). Each PCR  
95 reaction was amplified with identical unique 8 bp tags on the 5' end of the forward and reverse  
96 primers to allow for sample identification and to prevent tag-jumping (9). We performed 3 PCR  
97 replicates per scat and monitored for contamination by including 3 no-template controls per 96-  
98 well plate. PCR was performed in 20 µL reactions using 10 µL Kapa HiFi HotStart High Fidelity  
99 ReadyMix (Kapa Biosystems), 5.6 µL of forward and reverse primers (0.25 µM final  
100 concentration), 2.4 µL of water, and 2 µL DNA extracts (including extraction blanks and PCR no  
101 template controls). Cycling conditions were 95°C initial denaturation for 3 minutes, followed by 35  
102 cycles of 98°C for 20 seconds, 58°C for 15 seconds, 72°C for 30 seconds, and a final extension at  
103 72°C for 1 minutes. Following PCR, we quantified the DNA concentration of each sample using a  
104 fluorescence microplate reader with the AccuBlue dsDNA Quantitation Kit (Biotium, USA) and  
105 normalized each sample accordingly. We then pooled 3 µL from each sample into a 0.65 mL  
106 Eppendorf tube per 96-well plate. We used NEBNext Ultra II Library Prep Kit (New England  
107 Biolabs, USA) to adapt the library pools into Illumina sequencing libraries following the  
108 manufacturer's instructions (Illumina Inc, USA). We then purified the library pools using  
109 PCRclean DX (Aline Biosciences, USA), quantified DNA concentration using a Qubit 2.0

110 fluorometer (Life Technologies, USA), and normalized each pool before sending the libraries for  
 111 150 bp paired-end sequencing on an Illumina HiSeq 3000 at the Center for Genome Research  
 112 and Biocomputing, Oregon State University. Library size distribution was checked prior to  
 113 sequencing using a High Sensitivity D5000 DNA ScreenTape assay on an Agilent TapeStation  
 114 4200 (Agilent Technologies, USA). The raw sequence reads were paired using PEAR (10) and  
 115 demultiplexed based on the unique 8 bp index tags using a custom shell script. Unique reads  
 116 from each sample replicate were clustered, counted and taxonomically assigned using BLAST  
 117 (www.ncbi.nlm.nih.gov/blast), against all 12S vertebrate sequences in Genbank. We used the  
 118 negative controls to set filtering read thresholds and assigned species if present in at least 2 out  
 119 of the 3 replicates.

120  
 121 **Text S6. Identification of cougar kill sites.** After killing large prey, cougars remain close to the  
 122 carcass for several days as they feed (11). This reduction in movement can be detected in GPS  
 123 collar locations, which often display a distinct cluster of locations that can be distinguished from  
 124 other behaviors such as traveling or searching for prey (12, 13). We physically investigated a  
 125 subset of potential cougar kills, hereafter “clusters” and confirmed prey at 128 sites following the  
 126 protocol outlined by (13), and the remainder were identified using a clustering algorithm  
 127 developed by (12) and modified by (13). However, that algorithm was developed to identify  
 128 potential (not probable) kill sites and therefore generated an unacceptably high number of false  
 129 positives to meet our objectives. We therefore used logistic regression equations developed by  
 130 (13) and (14) to predict the probability of the presence of an ungulate prey item at the cluster (1/0)  
 131 to restrict potential clusters to those with a high probability of containing ungulate prey. We  
 132 validated the model by comparing its predictions with clusters physically investigated and  
 133 determined that the model correctly identified true positives (i.e. the presence of an ungulate prey  
 134 item) in 81.6% of cases and identified true negatives in 86.5% of instances.

135  
 136 **Text S7. Details on predation rate calculations.** We calculated the cougar intraguild predation  
 137 rate on coyotes ( $P_{coyote}$ ) as the number of coyotes killed per unit time ( $K_{coyote}$ ) divided by coyote  
 138 population density ( $D_{coyote}$ ), where  $K_{coyote}$  is the product of cougar population density ( $D_{cougar}$ ),  
 139 cougar kill rate (kills/year;  $R$ ), and proportion of kills corresponding to coyotes ( $F_{coyote}$ ):

140  
 141 
$$P_{coyote} = \frac{K_{coyote}}{D_{coyote}} = \frac{D_{cougar} \times R \times F_{coyote}}{D_{coyote}}$$

142  
 143 Each parameter in the predation rate equation was estimated using empirical data and therefore  
 144 is itself a random variable with an associated measure of uncertainty that we sought to  
 145 acknowledge. Thus, in order to propagate all the error in predation rate calculation arising from  
 146 the uncertainty of each individual parameter, we used a Monte Carlo simulation approach. We  
 147 calculated the predation rate using 10,000 Markov Chain Monte Carlo simulations where each  
 148 iteration used a random draw from a distribution matching the mean and variance of the empirical  
 149 estimates for each parameter. We used gamma distributions for cougar and coyote densities from  
 150 a genetic spatial-capture recapture study in the same area (15), a gamma distribution for number  
 151 of cougar kills per year from an adjacent study area (13), and a beta distribution for the proportion  
 152 of cougar kills in which coyotes were the prey based on kill site investigations in this study:

153  
 154 cougar density  $\sim$  Gamma  $\left(\frac{2.2^2}{0.7^2}, \frac{2.2}{0.7^2}\right)$   
 155 coyote density  $\sim$  Gamma  $\left(\frac{33.9^2}{3.3^2}, \frac{33.9}{3.3^2}\right)$   
 156 kill rate  $\sim$  Gamma  $\left(\frac{54.5^2}{3.0^2}, \frac{54.5}{3.0^2}\right)$   
 157 proportion coyote  $\sim$  Beta(9, 119)  
 158

159 The distributions specified above assume 1.7 (standard deviation = 0.7) cougars per 100 km<sup>2</sup>,  
160 25.0 (standard deviation = 2.6) coyotes per 100 km<sup>2</sup>, a cougar kill rate of 54.5 (standard deviation  
161 = 3.0) prey items per year, and that coyotes represented 7.0% of the prey items killed by cougars  
162 (9 coyotes out of 128 prey items).

163  
164 **Text S8. Description of spatial covariates used in SSFs.** We calculated the natural log-  
165 transformed Euclidean distances between the endpoint of each observed and random step and  
166 the nearest road open to motorized vehicle use and perennial water source (data sources from  
167 the US Forest Service). We used Integrated Land Assessment Project products for estimates of  
168 canopy cover (16) and delineations of potential vegetation type (17), a factor variable with  
169 categories for wet forest, dry forest, grasslands, and other. We used the vector ruggedness  
170 measure (18) to characterize variation in terrain, aspect, and slope. All continuous spatial  
171 variables were scaled to have a mean of zero and standard deviation of one.

172  
173 **Text S9. Evaluation of coyote step-selection functions separated by sex.** Post-hoc, we  
174 evaluated whether attraction to known or predicted cougar kill sites varied as a function of sex in  
175 coyotes by fitting SSFs separately for males ( $N = 10$ ) and females ( $N = 7$ ). The direction of the  
176 D2C and D2K variables were similar for both males and females, although the magnitude of  
177 these terms were smaller and not statistically significant in the female-only model (Table S2).

178  
179 **Text S10. Evaluation of coyote step-selection functions separated by resident vs transient**  
180 **status.** Post-hoc, we evaluated whether attraction to known or predicted cougar kill sites varied  
181 as a function of the behavioral status (i.e. resident vs transient) in coyotes. Coyotes were  
182 classified as residents ( $N = 10$ ) if they were faithful to small (< 20 km<sup>2</sup>) territories and exhibited  
183 central-point foraging behavior, or transient ( $N = 7$ ) if they had large (200–400 km<sup>2</sup>) or poorly-  
184 defined territories and exhibited random, transitory movements without fidelity to any given area.  
185 The direction and magnitude of the D2C and D2K variables were similar between residents and  
186 transients, although these terms were not statistically significant in the transient-only model  
187 (Table S3).

188  
189 **Text S11. Evaluation of a coyote step-selection function with a term for ‘cougar on kill’.**  
190 Post-hoc, we evaluated whether the inclusion of a variable indicating whether the nearest cougar  
191 was on a kill (hereafter, ‘cougar on kill’ or CK) modified the effect of D2K. CK was a binary  
192 indicator variable denoting whether the nearest cougar was within 100 m of a known or predicted  
193 kill. We cast CK as an interaction with D2K allowing the sign and magnitude of D2K to differ  
194 based on whether the cougar was on a kill. In this model, D2K as a main effect remained  
195 significant ( $p = < 0.001$ ) indicating coyotes are attracted to kill sites (Table S4). The interaction  
196 between CK and D2K was not significant ( $p = 0.81$ ) suggesting that coyotes were no less likely to  
197 visit the kill if a cougar was present (Table S4). We suggest this provides evidence that coyotes  
198 avoid cougars when they offer no food reward but accept the risk of being near a cougar if  
199 scavenging opportunities are available.

200  
201 **Text S12. Evaluation of a step-selection function assessing bobcat avoidance of coyotes.**  
202 Post-hoc, we evaluated whether bobcats altered movements in response to the nearest known  
203 coyote (Table S5). We fit SSFs for bobcats with the same suite of landscape and movement  
204 variables as the other analyses but we replaced “Distance to Cougar” with “Distance to Coyote”  
205 (D2C). The D2C variable measured whether bobcats made movements toward versus away from  
206 the nearest known coyote if one was present within 1,000 m of the focal bobcat (“Coyote Present”  
207 or CP). This analysis was motivated by our finding that bobcats were not attracted to cougar kill  
208 sites and we thereby sought to determine whether coyote presence could explain the lack of  
209 attraction to kill sites since coyote activity dominated scavenging activity at carcasses.

210  
211 **Text S13. Evaluation of different buffer sizes to determine “cougar presence” or “kill**  
212 **presence” in step-selection functions.** To ensure that inference on the direction or magnitude  
213 of the effects of D2C and D2K in step selection functions was not influenced by the choice of  
214 buffers indicating whether a cougar or kill was present, we evaluated other potential buffers. For

215 cougar presence (CP) our original analysis used a value of 1,000 m beyond which we assumed a  
216 cougar could not be detected by a co-occurring carnivore. We also present results for buffers of  
217 500 m and 1,500 m (Table S6–S8). Similarly, for kill presence (KP) we evaluated values of 2,000  
218 m and 4,000 m (Table S9–S11) in addition to our original analysis using 3,000 m.

219  
220 **Text S14. Evaluation of black bear step-selection functions separated by sex.** Post-hoc, we  
221 evaluated whether attraction to known or predicted cougar kill sites varied as a function of sex in  
222 bears by fitting SSFs separately for males ( $N = 7$ ) and females ( $N = 4$ ). While the D2K variable  
223 was not significant for either males or females, interpreting the sign of the coefficients suggested  
224 that males tended to be attracted to kill sites whereas females tended to avoid them (Table S12).  
225

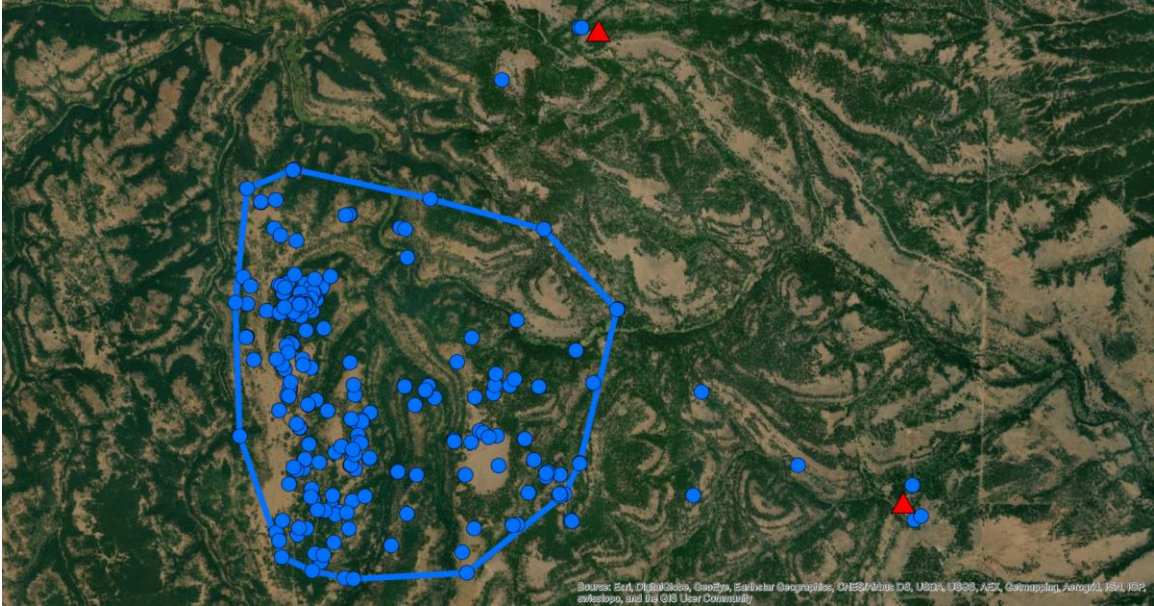

226  
227  
228  
229  
230  
231

**Fig. S1.** GPS locations showing two separate bouts of male coyote L13 traveling to reach an elk carcass (red triangle). The movements were 2.2 km and 3.6 km from the nearest perimeter of the animal's home range as defined by a 95% minimum convex polygon (blue polygon). Blue points indicate GPS collar locations.

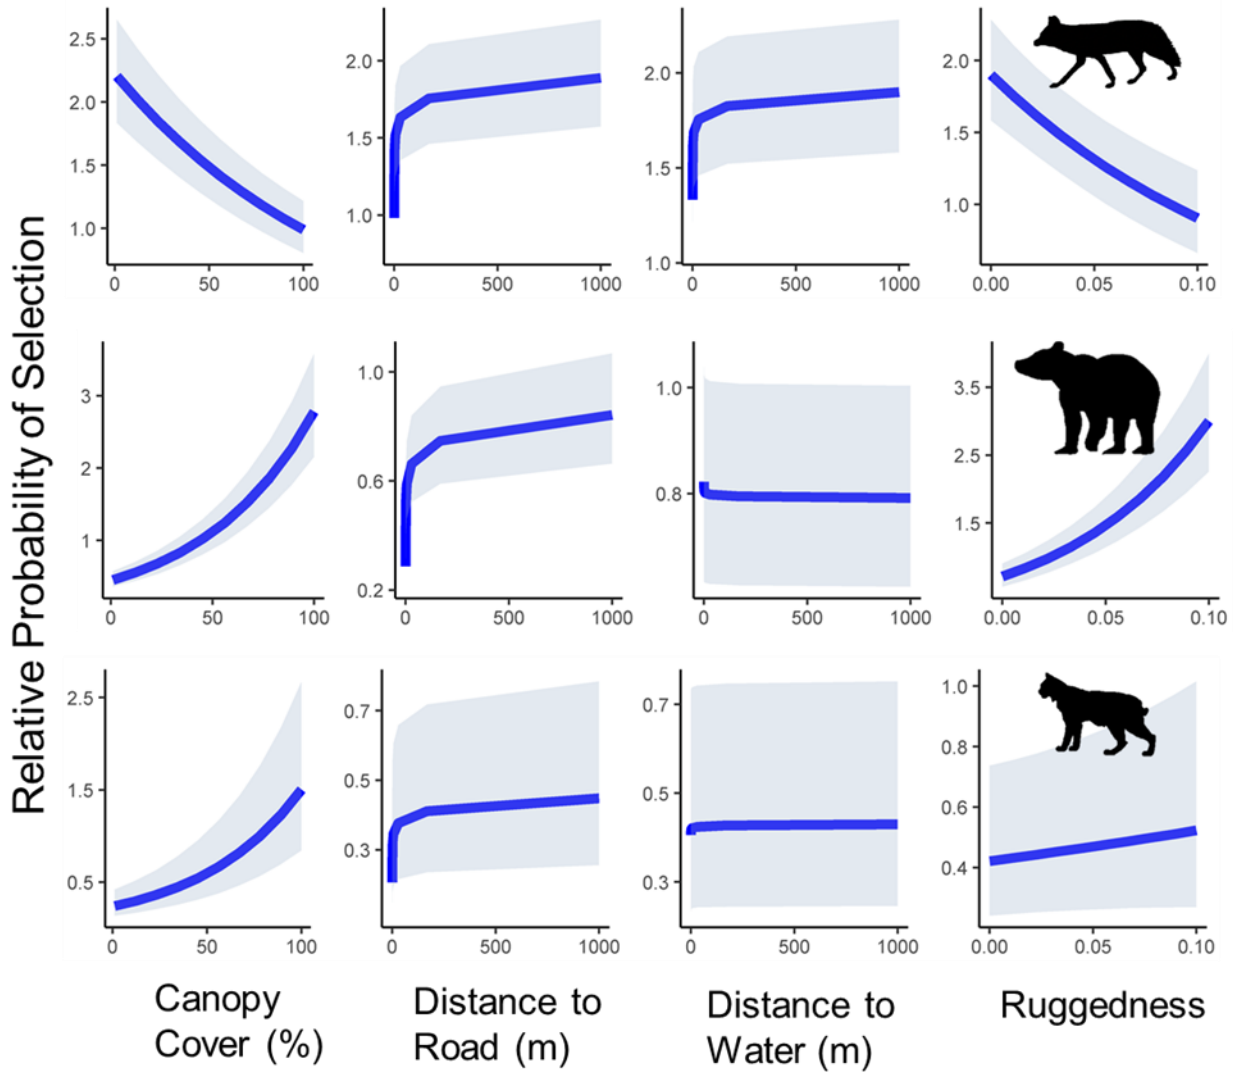

232

233 **Fig. S2.** Marginal response plots showing the relative probability of selection of landscape  
 234 features estimated from step selection functions for (top to bottom) coyotes, black bears, and  
 235 bobcats. The model estimate is displayed by the blue line and the 95% confidence interval is  
 236 provided by the shaded band.  
 237



238

239

240

241

**Table S1.** Model selection results of step-selection functions for habitat-only models and habitat + cougar models.  $\Delta$ AIC gives the change in AIC value from the top model where values of zero indicate the top model.

| Species | $\Delta$ AIC |                  |
|---------|--------------|------------------|
|         | Habitat Only | Habitat + Cougar |
| Bear    | 10.36        | 0                |
| Bobcat  | 0            | 2.69             |
| Coyote  | 24.0         | 0                |

242

243

244 **Table S2.** Parameter estimates for step-selection functions for coyotes separated by sex. PVT =  
 245 potential vegetation type, CP = cougar present, D2C = distance to nearest cougar, KP = kill  
 246 present, D2K = distance to kill, and TSK = time since kill.

|                                          | Male    |        |        | Female  |      |        |
|------------------------------------------|---------|--------|--------|---------|------|--------|
|                                          | $\beta$ | SE     | P      | $\beta$ | SE   | P      |
| Canopy Cover                             | -0.14   | 0.010  | <0.001 | -0.09   | 0.02 | <0.001 |
| Distance to Road <sup>1</sup>            | 0.087   | 0.011  | <0.001 | 0.08    | 0.02 | <0.001 |
| Distance to Water <sup>1</sup>           | 0.026   | 0.011  | 0.017  | 0.01    | 0.02 | 0.44   |
| Ruggedness                               | -0.059  | 0.011  | <0.001 | -0.08   | 0.02 | <0.001 |
| PVT, Wet Forest <sup>2</sup>             | -0.037  | 0.029  | 0.20   | -0.18   | 0.04 | <0.001 |
| PVT, Dry Forest <sup>2</sup>             | -0.066  | 0.024  | 0.0065 | -0.09   | 0.04 | 0.03   |
| PVT, Other <sup>2</sup>                  | -0.19   | 0.19   | 0.31   | -0.35   | 0.25 | 0.16   |
| Step Length <sup>1</sup>                 | 0.028   | 0.0038 | <0.001 | 0.02    | 0.01 | <0.001 |
| Turning Angle <sup>3</sup>               | -0.11   | 0.011  | <0.001 | -0.05   | 0.02 | 0.01   |
| CP × D2C <sup>1</sup>                    | 0.25    | 0.10   | 0.012  | 0.10    | 0.15 | 0.52   |
| KP × D2K <sup>1</sup>                    | -0.31   | 0.063  | <0.001 | -0.13   | 0.11 | 0.25   |
| KP × D2K <sup>1</sup> × TSK <sup>1</sup> | 0.086   | 0.027  | 0.0012 | 0.03    | 0.05 | 0.52   |

247 <sup>1</sup>Indicates the variable was natural log transformed; <sup>2</sup>the reference category was Grassland;  
 248 <sup>3</sup>indicates the cosine of the variable was used.  
 249

250 **Table S3.** Parameter estimates for step-selection functions for coyotes separated by behavioral  
 251 status (resident vs transient). PVT = potential vegetation type, CP = cougar present, D2C =  
 252 distance to nearest cougar, KP = kill present, D2K = distance to kill, and TSK = time since kill.

|                                          | Resident |        |        | Transient |      |        |
|------------------------------------------|----------|--------|--------|-----------|------|--------|
|                                          | $\beta$  | SE     | P      | $\beta$   | SE   | P      |
| Canopy Cover                             | -0.13    | 0.01   | <0.001 | -0.12     | 0.02 | <0.001 |
| Distance to Road <sup>1</sup>            | 0.08     | 0.01   | <0.001 | 0.09      | 0.02 | <0.001 |
| Distance to Water <sup>1</sup>           | 0.04     | 0.01   | <0.001 | -0.01     | 0.02 | 0.53   |
| Ruggedness                               | -0.06    | 0.01   | <0.001 | -0.06     | 0.02 | <0.001 |
| PVT, Wet Forest <sup>2</sup>             | -0.07    | 0.03   | 0.01   | -0.11     | 0.04 | 0.01   |
| PVT, Dry Forest <sup>2</sup>             | -0.08    | 0.03   | <0.001 | -0.07     | 0.04 | 0.06   |
| PVT, Other <sup>2</sup>                  | -0.29    | 0.25   | 0.24   | -0.25     | 0.19 | 0.18   |
| Step Length <sup>1</sup>                 | 0.03     | <0.001 | <0.001 | 0.01      | 0.01 | 0.03   |
| Turning Angle <sup>3</sup>               | -0.16    | 0.01   | <0.001 | 0.04      | 0.02 | 0.02   |
| CP × D2C <sup>1</sup>                    | 0.22     | 0.10   | 0.02   | 0.17      | 0.16 | 0.29   |
| KP × D2K <sup>1</sup>                    | -0.30    | 0.06   | <0.001 | -0.10     | 0.13 | 0.47   |
| KP × D2K <sup>1</sup> × TSK <sup>1</sup> | 0.09     | 0.03   | <0.001 | -0.01     | 0.06 | 0.90   |

253 <sup>1</sup>Indicates the variable was natural log transformed; <sup>2</sup>the reference category was Grassland;  
 254 <sup>3</sup>indicates the cosine of the variable was used.  
 255

256 **Table S4.** Parameter estimates for step-selection functions for coyotes with an added term for  
 257 'cougar on kill' (CK) that evaluates whether the sign or magnitude of 'distance to kill' changes if a  
 258 cougar is 100 m from the kill. This model was constructed to assess whether coyotes are less  
 259 attracted to cougar kill sites if the cougar is present. PVT = potential vegetation type, CP = cougar  
 260 present, D2C = distance to nearest cougar, KP = kill present, D2K = distance to kill, and TSK =  
 261 time since kill.

|                                          | $\beta$ | SE     | P      |
|------------------------------------------|---------|--------|--------|
| Canopy Cover                             | -0.13   | 0.01   | <0.001 |
| Distance to Road <sup>1</sup>            | 0.09    | 0.01   | <0.001 |
| Distance to Water <sup>1</sup>           | 0.02    | 0.01   | 0.01   |
| Ruggedness                               | -0.06   | 0.01   | <0.001 |
| PVT, Wet Forest <sup>2</sup>             | -0.09   | 0.02   | <0.001 |
| PVT, Dry Forest <sup>2</sup>             | -0.08   | 0.02   | <0.001 |
| PVT, Other <sup>2</sup>                  | -0.25   | 0.15   | 0.09   |
| Step Length <sup>1</sup>                 | 0.03    | <0.001 | <0.001 |
| Turning Angle <sup>3</sup>               | -0.09   | 0.01   | <0.001 |
| CP × D2C <sup>1</sup>                    | 0.21    | 0.08   | 0.01   |
| KP × D2K <sup>1</sup>                    | -0.26   | 0.06   | <0.001 |
| KP × D2K <sup>1</sup> × TSK <sup>1</sup> | 0.07    | 0.02   | <0.001 |
| CK × D2K <sup>1</sup>                    | -0.01   | 0.05   | 0.81   |

262 <sup>1</sup>Indicates the variable was natural log transformed; <sup>2</sup>the reference category was Grassland;  
 263 <sup>3</sup>indicates the cosine of the variable was used.  
 264

265 **Table S5.** Parameter estimates for step-selection functions for bobcats with covariates for  
 266 landscape variables and the presence of the nearest known coyote. This model was constructed  
 267 to assess whether bobcats alter movements in response to coyote presence. PVT = potential  
 268 vegetation type, CP = coyote present, and D2C = distance to nearest known coyote.

|                                | $\beta$ | SE   | P      |
|--------------------------------|---------|------|--------|
| Canopy Cover                   | 0.32    | 0.01 | <0.001 |
| Distance to Road <sup>1</sup>  | 0.10    | 0.02 | <0.001 |
| Distance to Water <sup>1</sup> | 0.01    | 0.02 | 0.58   |
| Ruggedness                     | 0.01    | 0.02 | 0.42   |
| PVT, Wet Forest <sup>2</sup>   | 0.95    | 0.07 | <0.001 |
| PVT, Dry Forest <sup>2</sup>   | 0.67    | 0.07 | <0.001 |
| PVT, Other <sup>2</sup>        | 1.38    | 0.32 | <0.001 |
| Step Length <sup>1</sup>       | 0.05    | 0.01 | <0.001 |
| Turning Angle <sup>3</sup>     | 0.21    | 0.02 | <0.001 |
| CP x D2C <sup>1</sup>          | 0.06    | 0.05 | 0.25   |

269 <sup>1</sup>Indicates the variable was natural log transformed; <sup>2</sup>the reference category was Grassland;

270 <sup>3</sup>indicates the cosine of the variable was used.

271 **Table S6.** Parameter estimates for step selection functions for coyotes using different buffer sizes  
 272 to determine cougar presence (CP). PVT = potential vegetation type, D2C = distance to nearest  
 273 cougar, KP = kill present, D2K = distance to kill, and TSK = time since kill.

|                                          | 500 m   |        |        | 1500 m  |        |        |
|------------------------------------------|---------|--------|--------|---------|--------|--------|
|                                          | $\beta$ | SE     | P      | $\beta$ | SE     | P      |
| Canopy Cover                             | -0.13   | 0.01   | <0.001 | -0.13   | 0.01   | <0.001 |
| Distance to Road <sup>1</sup>            | 0.09    | 0.01   | <0.001 | 0.09    | 0.01   | <0.001 |
| Distance to Water <sup>1</sup>           | 0.02    | 0.01   | 0.01   | 0.02    | 0.01   | 0.01   |
| Ruggedness                               | -0.06   | 0.01   | <0.001 | -0.06   | 0.01   | <0.001 |
| PVT, Wet Forest <sup>2</sup>             | -0.09   | 0.02   | <0.001 | -0.09   | 0.02   | <0.001 |
| PVT, Dry Forest <sup>2</sup>             | -0.08   | 0.02   | <0.001 | -0.08   | 0.02   | <0.001 |
| PVT, Other <sup>2</sup>                  | -0.25   | 0.15   | 0.09   | -0.25   | 0.15   | 0.09   |
| Step Length <sup>1</sup>                 | 0.03    | <0.001 | <0.001 | 0.03    | <0.001 | <0.001 |
| Turning Angle <sup>3</sup>               | -0.09   | 0.01   | <0.001 | -0.09   | 0.01   | <0.001 |
| CP × D2C <sup>1</sup>                    | 0.35    | 0.12   | <0.001 | <0.001  | 0.05   | 0.97   |
| KP × D2K <sup>1</sup>                    | -0.26   | 0.05   | <0.001 | -0.22   | 0.06   | <0.001 |
| KP × D2K <sup>1</sup> × TSK <sup>1</sup> | 0.07    | 0.02   | <0.001 | 0.06    | 0.02   | 0.02   |

274 <sup>1</sup>Indicates the variable was natural log transformed; <sup>2</sup>the reference category was Grassland;  
 275 <sup>3</sup>indicates the cosine of the variable was used.  
 276

277 **Table S7.** Parameter estimates for step selection functions for black bears using different buffer  
 278 sizes to determine cougar presence (CP). PVT = potential vegetation type, D2C = distance to  
 279 nearest cougar, KP = kill present, D2K = distance to kill, and TSK = time since kill.

|                                          | 500 m   |        |        | 1500 m  |        |        |
|------------------------------------------|---------|--------|--------|---------|--------|--------|
|                                          | $\beta$ | SE     | P      | $\beta$ | SE     | P      |
| Canopy Cover                             | 0.36    | 0.01   | <0.001 | 0.36    | 0.01   | <0.001 |
| Distance to Road <sup>1</sup>            | 0.14    | 0.01   | <0.001 | 0.14    | 0.01   | <0.001 |
| Distance to Water <sup>1</sup>           | -0.01   | 0.01   | 0.37   | -0.01   | 0.01   | 0.37   |
| Ruggedness                               | 0.16    | 0.01   | <0.001 | 0.16    | 0.01   | <0.001 |
| PVT, Wet Forest <sup>2</sup>             | 0.42    | 0.03   | <0.001 | 0.42    | 0.03   | <0.001 |
| PVT, Dry Forest <sup>2</sup>             | 0.26    | 0.03   | <0.001 | 0.26    | 0.03   | <0.001 |
| PVT, Other <sup>2</sup>                  | 1.39    | 0.11   | <0.001 | 1.39    | 0.11   | <0.001 |
| Step Length <sup>1</sup>                 | 0.04    | <0.001 | <0.001 | 0.04    | <0.001 | <0.001 |
| Turning Angle <sup>3</sup>               | 0.04    | 0.01   | <0.001 | 0.04    | 0.01   | <0.001 |
| CP × D2C <sup>1</sup>                    | 0.46    | 0.22   | <0.001 | 0.45    | 0.13   | <0.001 |
| KP × D2K <sup>1</sup>                    | 0.08    | 0.10   | 0.43   | 0.01    | 0.10   | 0.95   |
| KP × D2K <sup>1</sup> × TSK <sup>1</sup> | -0.05   | 0.04   | 0.25   | -0.02   | 0.04   | 0.60   |

280 <sup>1</sup>Indicates the variable was natural log transformed; <sup>2</sup>the reference category was Grassland;  
 281 <sup>3</sup>indicates the cosine of the variable was used.  
 282

283 **Table S8.** Parameter estimates for step selection functions for bobcats using different buffer sizes  
 284 to determine cougar presence (CP). PVT = potential vegetation type, D2C = distance to nearest  
 285 cougar, KP = kill present, D2K = distance to kill, and TSK = time since kill.

|                                          | 500 m   |      |        | 1500 m  |      |        |
|------------------------------------------|---------|------|--------|---------|------|--------|
|                                          | $\beta$ | SE   | P      | $\beta$ | SE   | P      |
| Canopy Cover                             | 0.32    | 0.01 | <0.001 | 0.32    | 0.01 | <0.001 |
| Distance to Road <sup>1</sup>            | 0.10    | 0.02 | <0.001 | 0.10    | 0.02 | <0.001 |
| Distance to Water <sup>1</sup>           | 0.01    | 0.02 | 0.45   | 0.01    | 0.02 | 0.46   |
| Ruggedness                               | 0.02    | 0.02 | 0.23   | 0.02    | 0.02 | 0.23   |
| PVT, Wet Forest <sup>2</sup>             | 0.98    | 0.07 | <0.001 | 0.98    | 0.07 | <0.001 |
| PVT, Dry Forest <sup>2</sup>             | 0.71    | 0.07 | <0.001 | 0.71    | 0.07 | <0.001 |
| PVT, Other <sup>2</sup>                  | 1.26    | 0.31 | <0.001 | 1.26    | 0.31 | <0.001 |
| Step Length <sup>1</sup>                 | 0.05    | 0.01 | <0.001 | 0.05    | 0.01 | <0.001 |
| Turning Angle <sup>3</sup>               | 0.22    | 0.02 | <0.001 | 0.22    | 0.02 | <0.001 |
| CP × D2C <sup>1</sup>                    | 0.17    | 0.35 | 0.62   | -0.06   | 0.16 | 0.72   |
| KP × D2K <sup>1</sup>                    | 0.14    | 0.17 | 0.41   | 0.15    | 0.17 | 0.38   |
| KP × D2K <sup>1</sup> × TSK <sup>1</sup> | -0.09   | 0.07 | 0.19   | -0.10   | 0.07 | 0.17   |

286 <sup>1</sup>Indicates the variable was natural log transformed; <sup>2</sup>the reference category was Grassland;  
 287 <sup>3</sup>indicates the cosine of the variable was used.  
 288



289 **Table S9.** Parameter estimates for step selection functions for coyotes using different buffer sizes  
 290 to determine kill presence (KP). PVT = potential vegetation type, CP = cougar present, D2C =  
 291 distance to nearest cougar, D2K = distance to kill, and TSK = time since kill.

|                                          | 2,000 m |        |        | 4,000 m |        |        |
|------------------------------------------|---------|--------|--------|---------|--------|--------|
|                                          | $\beta$ | SE     | P      | $\beta$ | SE     | P      |
| Canopy Cover                             | -0.13   | 0.01   | <0.001 | -0.13   | 0.01   | <0.001 |
| Distance to Road <sup>1</sup>            | 0.09    | 0.01   | <0.001 | 0.09    | 0.01   | <0.001 |
| Distance to Water <sup>1</sup>           | 0.02    | 0.01   | 0.01   | 0.02    | 0.01   | 0.01   |
| Ruggedness                               | -0.06   | 0.01   | <0.001 | -0.06   | 0.01   | <0.001 |
| PVT, Wet Forest <sup>2</sup>             | -0.08   | 0.02   | <0.001 | -0.09   | 0.02   | <0.001 |
| PVT, Dry Forest <sup>2</sup>             | -0.07   | 0.02   | <0.001 | -0.08   | 0.02   | <0.001 |
| PVT, Other <sup>2</sup>                  | -0.25   | 0.15   | 0.09   | -0.26   | 0.15   | 0.09   |
| Step Length <sup>1</sup>                 | 0.02    | <0.001 | <0.001 | 0.03    | <0.001 | <0.001 |
| Turning Angle <sup>3</sup>               | -0.09   | 0.01   | <0.001 | -0.09   | 0.01   | <0.001 |
| CP × D2C <sup>1</sup>                    | 0.14    | 0.08   | 0.09   | 0.20    | 0.08   | 0.02   |
| KP × D2K <sup>1</sup>                    | -0.13   | 0.05   | 0.02   | -0.25   | 0.05   | <0.001 |
| KP × D2K <sup>1</sup> × TSK <sup>1</sup> | 0.05    | 0.02   | <0.001 | 0.06    | 0.01   | <0.001 |

292 <sup>1</sup>Indicates the variable was natural log transformed; <sup>2</sup>the reference category was Grassland;  
 293 <sup>3</sup>indicates the cosine of the variable was used.  
 294

295 **Table S10.** Parameter estimates for step selection functions for black bears using different buffer  
 296 sizes to determine kill presence (KP). PVT = potential vegetation type, CP = cougar present, D2C  
 297 = distance to nearest cougar, D2K = distance to kill, and TSK = time since kill.

|                                          | 2,000 m |        |        | 4,000 m |        |        |
|------------------------------------------|---------|--------|--------|---------|--------|--------|
|                                          | $\beta$ | SE     | P      | $\beta$ | SE     | P      |
| Canopy Cover                             | 0.36    | 0.01   | <0.001 | 0.36    | 0.01   | <0.001 |
| Distance to Road <sup>1</sup>            | 0.14    | 0.01   | <0.001 | 0.14    | 0.01   | <0.001 |
| Distance to Water <sup>1</sup>           | -0.01   | 0.01   | 0.34   | -0.01   | 0.01   | 0.34   |
| Ruggedness                               | 0.16    | 0.01   | <0.001 | 0.16    | 0.01   | <0.001 |
| PVT, Wet Forest <sup>2</sup>             | 0.42    | 0.03   | <0.001 | 0.42    | 0.03   | <0.001 |
| PVT, Dry Forest <sup>2</sup>             | 0.26    | 0.03   | <0.001 | 0.26    | 0.03   | <0.001 |
| PVT, Other <sup>2</sup>                  | 1.39    | 0.11   | <0.001 | 1.39    | 0.11   | <0.001 |
| Step Length <sup>1</sup>                 | 0.04    | <0.001 | <0.001 | 0.04    | <0.001 | <0.001 |
| Turning Angle <sup>3</sup>               | 0.04    | 0.01   | <0.001 | 0.04    | 0.01   | <0.001 |
| CP × D2C <sup>1</sup>                    | 0.51    | 0.15   | <0.001 | 0.54    | 0.15   | <0.001 |
| KP × D2K <sup>1</sup>                    | 0.12    | 0.09   | 0.17   | 0.03    | 0.07   | 0.68   |
| KP × D2K <sup>1</sup> × TSK <sup>1</sup> | -0.07   | 0.02   | <0.001 | -0.04   | 0.02   | 0.04   |

298 <sup>1</sup>Indicates the variable was natural log transformed; <sup>2</sup>the reference category was Grassland;  
 299 <sup>3</sup>indicates the cosine of the variable was used.  
 300

301 **Table S11.** Parameter estimates for step selection functions for bobcats using two different buffer  
 302 sizes to determine kill presence (KP). PVT = potential vegetation type, CP = cougar present, D2C  
 303 = distance to nearest cougar, D2K = distance to kill, and TSK = time since kill.

|                                          | 2,000 m |      |        | 4,000 m |      |        |
|------------------------------------------|---------|------|--------|---------|------|--------|
|                                          | $\beta$ | SE   | P      | $\beta$ | SE   | P      |
| Canopy Cover                             | 0.32    | 0.01 | <0.001 | 0.32    | 0.01 | <0.001 |
| Distance to Road <sup>1</sup>            | 0.10    | 0.02 | <0.001 | 0.10    | 0.02 | <0.001 |
| Distance to Water <sup>1</sup>           | 0.01    | 0.02 | 0.46   | 0.01    | 0.02 | 0.45   |
| Ruggedness                               | 0.02    | 0.02 | 0.24   | 0.02    | 0.02 | 0.23   |
| PVT, Wet Forest <sup>2</sup>             | 0.98    | 0.07 | <0.001 | 0.98    | 0.07 | <0.001 |
| PVT, Dry Forest <sup>2</sup>             | 0.71    | 0.07 | <0.001 | 0.71    | 0.07 | <0.001 |
| PVT, Other <sup>2</sup>                  | 1.26    | 0.31 | <0.001 | 1.26    | 0.31 | <0.001 |
| Step Length <sup>1</sup>                 | 0.05    | 0.01 | <0.001 | 0.05    | 0.01 | <0.001 |
| Turning Angle <sup>3</sup>               | 0.22    | 0.02 | <0.001 | 0.22    | 0.02 | <0.001 |
| CP × D2C <sup>1</sup>                    | 0.27    | 0.26 | 0.31   | 0.29    | 0.27 | 0.28   |
| KP × D2K <sup>1</sup>                    | 0.07    | 0.18 | 0.70   | 0.01    | 0.16 | 0.97   |
| KP × D2K <sup>1</sup> × TSK <sup>1</sup> | -0.08   | 0.06 | 0.16   | -0.04   | 0.05 | 0.48   |

304 <sup>1</sup>Indicates the variable was natural log transformed; <sup>2</sup>the reference category was Grassland;

305 <sup>3</sup>indicates the cosine of the variable was used.

306 **Table S12.** Parameter estimates for a step-selection function for black bears separated by sex.  
 307 PVT = potential vegetation type, CP = cougar present, D2C = distance to nearest cougar, KP =  
 308 kill present, D2K = distance to kill, and TSK = time since kill.

|                                          | Male    |        |        | Female  |      |        |
|------------------------------------------|---------|--------|--------|---------|------|--------|
|                                          | $\beta$ | SE     | P      | $\beta$ | SE   | P      |
| Canopy Cover                             | 0.35    | 0.01   | <0.001 | 0.38    | 0.01 | <0.001 |
| Distance to Road <sup>1</sup>            | 0.09    | 0.02   | <0.001 | 0.25    | 0.03 | <0.001 |
| Distance to Water <sup>1</sup>           | -0.04   | 0.01   | <0.001 | 0.03    | 0.01 | 0.03   |
| Ruggedness                               | 0.15    | 0.01   | <0.001 | 0.17    | 0.01 | <0.001 |
| PVT, Wet Forest <sup>2</sup>             | 0.43    | 0.04   | <0.001 | 0.45    | 0.06 | <0.001 |
| PVT, Dry Forest <sup>2</sup>             | 0.22    | 0.04   | <0.001 | 0.35    | 0.05 | <0.001 |
| PVT, Other <sup>2</sup>                  | 0.60    | 0.17   | <0.001 | 2.37    | 0.16 | <0.001 |
| Step Length <sup>1</sup>                 | 0.03    | 0.01   | 0.09   | 0.06    | 0.02 | <0.001 |
| Turning Angle <sup>3</sup>               | 0.03    | <0.001 | <0.001 | 0.05    | 0.01 | <0.001 |
| CP × D2C <sup>1</sup>                    | 0.63    | 0.19   | <0.001 | 0.48    | 0.25 | 0.05   |
| KP × D2K <sup>1</sup>                    | -0.13   | 0.12   | 0.30   | 0.25    | 0.16 | 0.13   |
| KP × D2K <sup>1</sup> × TSK <sup>1</sup> | 0.04    | 0.05   | 0.40   | -0.12   | 0.07 | 0.06   |

309 <sup>1</sup>Indicates the variable was natural log transformed; <sup>2</sup>the reference category was Grassland;

310 <sup>3</sup>indicates the cosine of the variable was used.

311

312

313

314 **Movie S1 (separate file).** Video clip from remote camera deployed at an elk carcass killed by a  
315 GPS-collared cougar. The cougar chases off three coyotes which can be heard vocalizing in the  
316 background. This clip occurred immediately after the photograph in Fig. 1b was taken.

317 **Movie S2 (separate file).** Video clip from remote camera deployed at an elk carcass killed by a  
318 GPS-collared cougar. A coyote can be seen and heard bark-howling in the upper left as the  
319 cougar feeds in the bottom right of the frame.

320 **Movie S3 (separate file).** Video clip from remote camera deployed at an elk carcass killed by a  
321 GPS-collared cougar. A coyote can be seen and heard bark-howling in the upper left as the  
322 cougar vocalizes and then leaves the carcass. The coyote then approaches the carcass to feed.

323

324

## 325 **SI References**

326

327

- 328 1. C. W. Clark, M. Mangel, *Dynamic State Variable Models in Ecology: Methods and*  
329 *Applications* (Oxford University Press on Demand, 2000).
- 330 2. K. Bjørneraas, B. Van Moorter, C. M. Rolandsen, I. Herfindal, Screening global  
331 positioning system location data for errors using animal movement characteristics. *The*  
332 *Journal of Wildlife Management* **74**, 1361-1366 (2010).
- 333 3. R. S. Sikes, 2016 Guidelines of the American Society of Mammalogists for the use of wild  
334 mammals in research and education. *Journal of Mammalogy* **97**, 663-688 (2016).
- 335 4. M. M. Rowland, *The Starkey Project: History Facilities, and Data Collection Methods for*  
336 *Ungulate Research* (US Department of Agriculture, Forest Service, Pacific Northwest  
337 Research Station, 1997), vol. 396.
- 338 5. M. A. Murphy, L. P. Waits, K. C. Kendall, Quantitative evaluation of fecal drying methods  
339 for brown bear DNA analysis. *Wildlife Society Bulletin*, 951-957 (2000).
- 340 6. C. E. Eriksson, J. Ruprecht, T. Levi, More affordable and effective noninvasive single  
341 nucleotide polymorphism genotyping using high-throughput amplicon sequencing.  
342 *Molecular Ecology Resources* **20**, 1505-1516 (2020).
- 343 7. A. L. Massey, G. Roffler, T. Vermeul, J. M. Allen, T. Levi, Comparison of mechanical  
344 sorting and DNA metabarcoding for diet analysis with fresh and degraded wolf scats.  
345 *Ecosphere* **12**, e03557.
- 346 8. T. Riaz *et al.*, ecoPrimers: inference of new DNA barcode markers from whole genome  
347 sequence analysis. *Nucleic Acids Research* **39**, e145-e145 (2011).
- 348 9. I. B. Schnell, K. Bohmann, M. T. P. Gilbert, Tag jumps illuminated—reducing sequence-to-  
349 sample misidentifications in metabarcoding studies. *Molecular Ecology Resources* **15**,  
350 1289-1303 (2015).
- 351 10. J. Zhang, K. Kobert, T. Flouri, A. Stamatakis, PEAR: a fast and accurate Illumina Paired-  
352 End reAd mergeR. *Bioinformatics* **30**, 614-620 (2014).
- 353 11. P. Beier, D. Choate, R. H. Barrett, Movement patterns of mountain lions during different  
354 behaviors. *Journal of Mammalogy* **76**, 1056-1070 (1995).
- 355 12. K. H. Knopff, A. A. Knopff, A. Kortello, M. S. Boyce, Cougar kill rate and prey composition  
356 in a multiprey system. *The Journal of Wildlife Management* **74**, 1435-1447 (2010).
- 357 13. D. A. Clark, G. A. Davidson, B. K. Johnson, R. G. Anthony, Cougar kill rates and prey  
358 selection in a multiple-prey system in northeast Oregon. *The Journal of Wildlife*  
359 *Management* **78**, 1161-1176 (2014).
- 360 14. D. A. Clark, "Implications of cougar prey selection and demography on population  
361 dynamics of elk in northeast Oregon," PhD dissertation, Oregon State University,  
362 Corvallis, Oregon, USA (2014).
- 363 15. J. Ruprecht *et al.*, Evaluating and integrating spatial capture-recapture models with data  
364 of variable individual identifiability. *Ecological Applications*, e02405 (2021).

- 365 16. J. L. Ohmann, M. J. Gregory, Predictive mapping of forest composition and structure with  
366 direct gradient analysis and nearest-neighbor imputation in coastal Oregon, USA.  
367 *Canadian Journal of Forest Research* **32**, 725-741 (2002).
- 368 17. J. E. Halofsky, M. K. Creutzburg, M. A. Hemstrom, Integrating social, economic, and  
369 ecological values across large landscapes. *Gen. Tech. Rep. PNW-GTR-896. Portland,*  
370 *OR: US Department of Agriculture, Forest Service, Pacific Northwest Research Station.*  
371 *206 p. 896* (2014).
- 372 18. J. M. Sappington, K. M. Longshore, D. B. Thompson, Quantifying landscape ruggedness  
373 for animal habitat analysis: a case study using bighorn sheep in the Mojave Desert. *The*  
374 *Journal of Wildlife Management* **71**, 1419-1426 (2007).

375
